# Supplementary material for: Optimierung der Klauswehrordnung des Mondsees, Teil II – Hydrologie
Source: Springer Nature journal article supplement (doi:10.1007/s00506-023-01014-3), 2024-01-30
Supplement: MOESM1 [file 26679966]

# Online-Anhang zu „Optimierung der Klausurordnung des Mondsees II – Hydrologie“

Christoph Klingler<sup>a/b</sup>, Max Preiml<sup>c</sup>, Helmut Habersack<sup>c</sup>, Hubert Holzmann<sup>a</sup>

<sup>a</sup> Universität für Bodenkultur Wien, Department für Wasser-Atmosphäre-Umwelt, Institut für Hydrologie und Wasserwirtschaft, Muthgasse 18, 1190 Wien, Österreich

<sup>b</sup> baseflow AI solutions GmbH, 1070 Wien, Österreich

<sup>c</sup> Universität für Bodenkultur Wien, Department für Wasser-Atmosphäre-Umwelt, Institut für Wasserbau, Hydraulik und Fließgewässerforschung, Am Brigittenauer Sporn 3, 1200 Wien, Österreich

*Korrespondenz:* Christoph Klingler (christoph.klingler@boku.ac.at)

## 1 Kriterien

Alle 18 Kriterien werden auf Basis der modellierten Zeitreihen für den Wasserstand des Mondsees (W) sowie den Abfluss in der Seeache (Q) im Zeitraum 1977 bis 2021 berechnet.

Um jedem Bereich das gleiche Gewicht bei der Optimierung zu geben, erfolgt eine Einteilung der 18 Kriterien in sieben Bereiche (G1 bis G7), welche nachfolgend samt der Anzahl der zugehörigen Kriterien aufgezählt sind:

- G1** Hoher Wasserstand Mondsee, 2 Kriterien
- G2** Geringer Wasserstand Mondsee, 2 Kriterien
- G3** Hoher Abfluss Seeache, 3 Kriterien (davon 1 auf die Laichzeit der Schutzgüter im Frühjahr fokussiert)
- G4** Geringer Abfluss Seeache, 3 Kriterien (davon 1 auf die Laichzeit der Schutzgüter im Frühjahr fokussiert)
- G5** Saisonalität Wasserstand Mondsee, 2 Kriterien
- G6** Hoher Abflussgradient Seeache, 4 Kriterien (davon 3 auf die Laichzeit der Schutzgüter im Frühjahr fokussiert)
- G7** Arbeitsvermögen Wasserkraftwerke, 2 Kriterien

Die 18 Kriterien werden nachfolgend samt zugeordnetem Bereich und Gewichtung definiert:

### Wasserstand Mondsee

**W<sub>max</sub>** Maximaler Wasserstand des Mondsees. G1, Gewicht =  $18/(7 \times 2) = 1,286$ .

**W<sub>min</sub>** Minimaler Wasserstand des Mondsees. G2, Gewicht =  $18/(7 \times 2) = 1,286$ .

**K1.1** Falls der modellierte Wasserstand des Mondsees an einem Tag einen sehr hohen Wert erreicht, werden am entsprechenden Tag je nach Ausmaß der Überschreitung der kritischen Grenze Strafpunkte vergeben. Bei einem Wasserstand von 481,30 müA werden 0 Strafpunkte sowie beim Wasserstand von 482,30 müA 100 Strafpunkte zugeteilt, dazwischen erfolgt eine lineare Interpolation. Im Anschluss werden die Strafpunkte aller Tage im 45-jährigen Zeitraum aufsummiert und der Vergleichswert der Referenz (REF = Modellierung mit KWO1982) subtrahiert. Negative Werte bedeuten daher eine Verbesserung der Hochwassersituation am Mondsee im Vergleich zum behördlich bewilligten Zustand. G1, Gewicht =  $18/(7 \times 2) = 1,286$ .

**K1.2** Wie K1.1), nur erfolgt die Vergabe der Strafpunkte bei sehr geringen Wasserständen: bei 480,60 müA 0 Strafpunkte sowie bei 480,20 müA 100 Strafpunkte. G2, Gewicht =  $18/(7 \times 2) = 1,286$ .

**K3.1** Nach Berechnung der Änderung der monatlichen Mittelwerte des Wasserstands im Vergleich zu REF in [cm] werden die Werte aller Monate mit -1 multipliziert. Anschließend erfolgt die Aufsummierung der Werte der Monate März bis einschließlich Juni. Eine negative Zahl ist somit gleichbedeutend mit einer Erhöhung der mittleren Wasserstände in den Frühjahrsmonaten. G5, Gewicht =  $18/(7 \times 2) = 1,286$ .

**K3.2** Wie K3.1), nur werden die Werte der Monate Juli bis einschließlich November aufsummiert. G5, Gewicht =  $18/(7 \times 2)$  = 1,286.

### Abfluss Seeache

**Q<sub>max</sub>** Maximaler Abfluss der Seeache. G3, Gewicht =  $18/(7 \times 3) = 0,857$ .

**Q<sub>min</sub>** Minimaler Abfluss der Seeache. G4, Gewicht =  $18/(7 \times 3) = 0,857$ .

**ΔQ<sub>max</sub>** Maximale Betragsänderung des mittleren Abflusses von einem Tag zu jenem des vorherigen in der Laichzeit der Schutzgüter (April, Mai, Juni). G6, Gewicht =  $18/(7 \times 4) = 0,643$ .

**K2.1** Wie K1.1), nur erfolgt die Vergabe der Strafpunkte bei sehr hohen Abflüssen: bei  $40 \text{ m}^3/\text{s}$  0 Strafpunkte (HQ<sub>1</sub>) sowie bei  $100 \text{ m}^3/\text{s}$  100 Strafpunkte (HQ<sub>30</sub>). G3, Gewicht =  $18/(7 \times 3) = 0,857$ .

**K2.2** Wie K1.1), nur erfolgt die Vergabe der Strafpunkte bei sehr geringen Abflüssen: bei  $3,0 \text{ m}^3/\text{s}$  0 Strafpunkte sowie bei  $1,0 \text{ m}^3/\text{s}$  100 Strafpunkte. G4, Gewicht =  $18/(7 \times 3) = 0,857$ .

**K4.1** Repräsentiert den Mittelwert der zehn größten unabhängigen (Suchraum ± vier Tage) Abflusswerte in der Laichzeit der Schutzgüter (April, Mai, Juni). G3, Gewicht =  $18/(7 \times 3) = 0,857$ .

**K4.2** Wie K4.1), aber im Hinblick auf die zehn kleinsten unabhängigen Abflusswerte in der Laichzeit. G4, Gewicht =  $18/(7 \times 3) = 0,857$ .

**K5.1** Wie K4.1), aber Fokus auf Abflussgradienten (ΔQ<sub>max</sub>). G6, Gewicht =  $18/(7 \times 4) = 0,643$ .

**K5.2.1** Stellt das 75. Perzentil von ΔQ in der Laichzeit dar. G6, Gewicht =  $18/(7 \times 4) = 0,643$ .

**K5.2.2** Stellt das 90. Perzentil von ΔQ in der Laichzeit dar. G6, Gewicht =  $18/(7 \times 4) = 0,643$ .

### Wasserkraft

**K6.1)** Deklariert die Änderung des Regelarbeitsvermögens (RAV) beim oberen Wasserkraftwerk im Vergleich zu REF. Die Anpassung der Anlagenkennlinie  $P = f(Q)$  erfolgte derart, dass das RAV von 1,13 GWh mit den ebenfalls im Wasserbuch deklarierten Anlagenspezifikationen (Ausbaudurchfluss, Rohfallhöhe) mit REF im 45-jährigen Betrachtungszeitraum erreicht wird. Die Restwassermenge (ca. 500 l/s) für den Fischauf- und Abstieg bleibt unberücksichtigt, da die FAH erst vor kurzem gebaut wurde und das RAV im Wasserbuch die Restwassermenge noch nicht beinhaltet. Positive Werte stellen eine Erhöhung des RAV in MWh im Vergleich zu REF dar. G7, Gewicht =  $18/(7 \times 2) = 1,286$ .

**K6.2)** Nimmt Bezug auf die RAV Änderung des unteren Wasserkraftwerks. Die Anlagenkennlinie wurde von K6.1) übernommen, da im entsprechenden Wasserbuchauszug keine Angabe für das RAV vorhanden ist. G7, Gewicht =  $18/(7 \times 2) = 1,286$ .

## 2 Multikriterielle Optimierung

Die Vorgangsweise der mehrstufigen Optimierung wurde gewählt, da ohne vorgeschaltete semiautomatische Grobsuche mit anschließender Einschränkung des Suchraums für die automatische Optimierung mittels DDS 1) sehr viele Optimierungsläufe mit entsprechend langer Rechenzeit notwendig wären, 2) die Gefahr eines übersehenen lokalen Minimums steigen würde, 3) die Optimierung aufgrund eines größeren Schwankungsbereichs des Zielwerts instabiler wäre, 4) Ausreißer deutlich häufiger wären, und 5) es sehr schwierig wäre vor der Optimierung Grenzwerte für die Skalierung bzw. eine Rangliste je Kriterium so festzulegen, dass Ausreißer keinen zu starken Einfluss nehmen (großer Wertebereich bei einem Kriterium reduziert Sensitivität im sinnvollen Bereich) und gleichzeitig Objektivität gewahrt wird.

## 2.1 Grobsuche

Bei der Grobsuche geht es darum je Periode eine KWO (Klauswehrordnung bzw. Konsumtionslinie) zu finden, welche den Ansprüchen der einzelnen Nutzergruppen möglichst weit entgegenkommt und gleichzeitig die Situation für die anderen Gruppen nicht untragbar verschlechtert bzw. keine No-Go's (Kapitel 3.3.1 des Artikels) vorliegen. Zuerst erfolgt die Festlegung auf drei (Periode 1 sowie 2) bzw. vier (Periode 3) Stützpunkte, welche voroptimiert werden (Abb. 3 im Artikel). Der Verlauf zwischen diesen Stützpunkten erfolgt linear, da eine Abweichung davon einen erhöhten Abflussgradienten in einem bestimmten Bereich zur Folge hätte. Für jeden zu optimierendem Stützpunkt wird nach zahlreichen initialen Modellläufen, anhand derer ein Systemverständnis erlangt wird, die Startposition (je Periode) festgelegt sowie Grenzwerte für die Skalierung der Kriterien ermittelt (ident für alle drei Perioden). Um die einzelnen Kriterien miteinander vergleichen zu können, kommt eine lineare Skalierung auf den Wertebereich -1 (maximale Verbesserung) bis +1 (maximale Verschlechterung) zur Anwendung, wobei der Wert 0 beim Ergebnis von REF definiert wird. Um Ausreißern keinen bestimmenden Einfluss auf die Optimierung zukommen zu lassen, werden bei jedem der 18 Kriterien Grenzwerte festgelegt, unter bzw. über denen die Werte -1 bzw. +1 zugeteilt werden. Anschließend wird um jeden zu optimierenden Stützpunkt ein Grobraster (für Stützpunkte im Regulierungsbereich) bzw. symmetrisch verteilte Punkte entlang der unteren hydraulischen Grenzlinie mit größerem Abstand festgelegt (fünf Möglichkeiten je Stützpunkt) und alle Varianten für die Festsetzung der KWO ( $5^3$  für Periode 1 und Periode 2 bzw.  $5^4$  für Periode 3) getrennt für die drei in Kapitel 3.3.2 (im Artikel) definierten Perioden modelliert. Falls eine lineare Verbindung zwischen zwei Stützpunkten keine positive Steigung hat (keine oder negative Steigung in der KWO wäre grundsätzlich möglich, aber nicht sinnvoll) wird der entsprechende Modellierungslauf übersprungen. Bei der Ermittlung der Optimalvariante der Grobsuche werden drei Zielwerte (Z1, Z2, Z3) in unterschiedlicher Reihenfolge beachtet, wobei Z1 Vorrang ggü. Z2 und Z2 ggü. Z3 hat. 1) Der Zielwert Z1 beschreibt, ob ein No-Go vorliegt oder nicht. Alle Varianten, bei dem zumindest ein No-Go vorliegt, werden ausgeschieden. 2) Bei den übrigen Varianten kommt der Zielwert Z2 zur Anwendung, welcher die Anzahl der Kriterien zusammenfasst, die im Vergleich zu REF verschlechtert werden. In der Auswahl verbleiben jene Varianten, die den geringsten Wert bei Z2 aufweisen. 3) Schließlich definiert der Zielwert Z3 die Summe aller 18 skalierten Kriterien, wobei die Variante mit dem niedrigsten Wert bei Z3 die Optimalvariante darstellt. Die Grobsuche wird mit jeweils feinerem Suchraster um die einzelnen Stützpunkte solange wiederholt, bis bei Z3 ein Plateau erreicht ist. Das Ergebnis der Grobsuche sind voroptimierte saisonale KWO.

## 2.2 Ranglistenstellung

Den bei der Grobsuche voroptimierten saisonalen KWO wird jeweils ein umhüllender Suchraum zugewiesen, indem jeder voroptimierte Stützpunkte bei der entsprechenden Q-Position um +5 sowie -5 cm versetzt wird und je Seite (ober- bzw. unterhalb der voroptimierten KWO) die neuen Punkte geradlinig verbunden werden. Dabei werden die hydraulischen Randbereiche (Abb. 3 im Artikel) beachtet. Im Anschluss werden je Periode neben den beiden KWO am oberen und unteren Bereich des Suchraums 97 Varianten für die Gestaltung der KWO erstellt, bei denen die Stützpunkte innerhalb des vorgegebenen Suchraums ( $\pm 5$  cm) zufällig gewählt werden und eine durchwegs positive Steigung der KWO gegeben ist. Da drei voneinander abhängige Perioden (die Evaluierung erfolgt über alle drei Perioden) festgelegt wurden, ergeben sich  $100^3 = 1$  mio. Varianten. Davon werden aus ressourcentechnischen Gründen 1000 ausgewählt, wobei die Varianten an den Randbereichen der Suchräume sowie mit der voroptimierten KWO je Periode fix übernommen werden ( $3^3 = 27$  Varianten). Die restlichen 973 werden zufällig gezogen. Die Modellierungsergebnisse der KWO Auswahl dienen schließlich als Grundlage zur Erstellung einer Rangliste (1000 = bestes Ergebnis, 1 = schlechtestes Ergebnis) für jedes der 18 Kriterien.

## 2.3 Feinsuche

Nach Festlegung des Suchraums je saisonal voroptimierter KWO sowie Erstellung der Ranglisten erfolgt anhand des automatischen DDS (Dynamically Dimensioned Search; Tolson & Shoemaker, 2007) Algorithmus die Festlegung der

Positionen der einzelnen Stützpunkte. Der DDS Algorithmus eignet sich gut zur effizienten Kalibrierung von hochdimensionalen Modellen (viele Parameter), da die Suchebene auf Basis der vorgegebenen maximalen Anzahl an Modellläufen automatisch skaliert wird (von global zu lokal) und die Optimierung der Parameter des Algorithmus (auch Hyperparameter Tuning genannt) nicht unbedingt notwendig ist (Tolson & Shoemaker, 2007). Die Anzahl der Hyperparameter ist mit der maximalen Anzahl an Modellläufen ( $m$ ) sowie dem „Radius“ bei der Suche nach besseren Parametersets ( $r$ ) im Anbetracht der hohen Performance des Algorithmus zudem gering. Der DDS Algorithmus wird in der Programmierumgebung mit dem R Paket „mcu“ (Kneis, 2019) eingebunden. Die Optimierung erfolgt getrennt für jede der drei Perioden. Bei der ersten Runde der Feinsuche werden die Hyperparameter der DDS Optimierung mit  $m = 200$  Modellläufen,  $r = 0,2$  (Standardwert bei DDS) und als Initialwerte die Positionen der Stützpunkte der voroptimierten KWO vorgegeben. Nach Abschluss der ersten Runde wird bei der zweiten Runde mit je 100 Läufen der  $r$ -Wert auf 0,1 (feinere Suche) reduziert und als Initialwerte die Werte des besten Ergebnisses der ersten Runde definiert. Insgesamt werden daher die W-Werte an 10 Stützpunkten (Periode 1 und 2: 3 Stützpunkte bzw. Periode 3: 4 Stützpunkte) bei 900 Modellläufen ( $3 \times 200 + 3 \times 100$ ) optimiert.

## 2.4 Zielwert

Der Zielwert  $Z$ , welcher im Zuge der Optimierung minimiert wird, ist in Gl. 1 bzw. Gl. 2 definiert. Gl. 2 kommt anstelle von Gl. 1 zur Anwendung, wenn die linearen Verbindungen der generierten KWO nicht durchwegs positiv sind, also die Höhenwerte nicht durchwegs mit steigendem Abfluss ansteigen.

$$Z = Z1 \times 10 + Z2 - \frac{\sum_{i=1}^{18} Z3_i \times G_i}{1000} \quad (1)$$

$$Z_n = |Z4| \times 10 + 10 \quad (2)$$

In Gl. 1 stellt  $Z1$  die Anzahl der No-Go's (Kapitel 3.3.1 des Artikels),  $Z2$  die Anzahl der Kriterien, welche im Vergleich zu REF verschlechtert werden,  $Z3_i$  den Rang eines Kriteriums innerhalb der zugehörigen Rangliste (bestenfalls 1000, schlechtestenfalls 1), sowie  $G_i$  das Gewicht des entsprechenden Kriteriums (Kapitel 1 des vorliegenden Online-Anhangs) dar. Der zumindest rechnerisch bestmögliche Fall würde somit einen  $Z$ -Wert von -18 ergeben. In Gl. 2 ist  $Z4$  die größte negative Höhendifferenz des Wasserstands in [cm] zwischen zwei Stützpunkten, falls die generierte KWO eine negative Steigung aufweist.

## Literatur

- Kneis D (2019): Model calibration utilities. R package “mcu”, v 0.1, GitHub, <https://rdr.io/github/dkneis/mcu/> (Zugriff: 21.03.2023)
- Tolson B A & Shoemaker C A (2007): Dynamically dimensioned search algorithm for computationally efficient watershed model calibration. 47(1), W01413, <https://doi.org/10.1029/2005WR004723>
